# Supplementary material for: Self-healing and anti-freezing graphene–hydrogel–graphene sandwich strain sensor with ultrahigh sensitivity
Source: Royal Society of Chemistry journal article supplement (doi:10.1039/d1tb00082a), 2021-01-01
Supplement: d1tb00082a1.pdf [file d1tb00082a1.pdf]

# **Self-healing and anti-freezing graphene-hydrogel-graphene sandwich strain sensor with ultrahigh sensitivity**

Lu Wu<sup>1</sup>, Mingshuai Fan<sup>1</sup>, Meijie Qu<sup>1</sup>, Shuaitao Yang<sup>2</sup>, Jia Nie<sup>1</sup>, Ping Tang<sup>1</sup>, Lujun Pan<sup>2</sup>, Hai Wang<sup>1\*</sup>, Yuezhen Bin<sup>1\*</sup>

<sup>1</sup> Department of Polymer Science and Engineering, School of Chemical Engineering, Dalian University of Technology, Dalian, 116024, P. R. China. E-mail: binyz@dlut.edu.cn, haiwang@dlut.edu.cn

<sup>2</sup> School of Physics, Dalian University of Technology, Dalian, 116024, P. R. China.

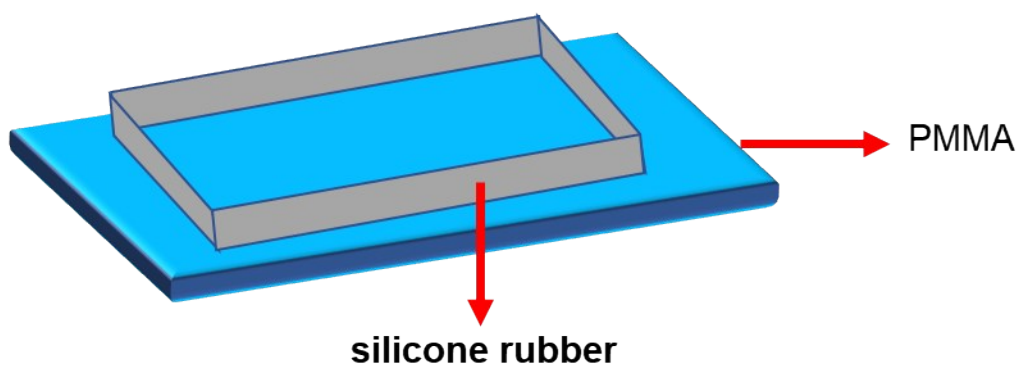

**Fig. S1.** Schematic diagram of mold for preparing graphene deposited layer

**Table S1.** Compositions of various composite hydrogel samples

| Samples     | AA<br>(g) | PVA<br>(g) | Water<br>(g) | Glycerol<br>(g) | Fe <sup>3+</sup> <sup>b</sup><br>(mol%) | APS<br>(g) | TEMED<br>(μL) |
|-------------|-----------|------------|--------------|-----------------|-----------------------------------------|------------|---------------|
| PVA-4/PAA-1 | 6.66      | 2.0        | 9.5          | 9.5             | 0.5                                     | 0.05       | 25            |
| PVA-4/PAA-2 | 6.66      | 2.0        | 9.5          | 9.5             | 0.1                                     | 0.05       | 25            |
| PVA-4/PAA-3 | 6.66      | 2.0        | 9.5          | 9.5             | 0.15                                    | 0.05       | 25            |
| PVA-4/PAA-4 | 6.66      | 2.0        | 9.5          | 9.5             | 0.2                                     | 0.05       | 25            |

$${}^b \text{Fe}^{3+} (\text{mol}\%) = [\text{mol} (\text{Fe}^{3+}) / \text{mol} (\text{AA})] \times 100\%$$

**Table S2.** Compositions of various composite hydrogel samples

| Samples     | AA<br>(g) | PVA<br>(g) | Water<br>(g) | Glycerol<br>(g) | Fe <sup>3+</sup> <sup>b</sup><br>(mol%) | APS<br>(g) | TEMED<br>(μL) |
|-------------|-----------|------------|--------------|-----------------|-----------------------------------------|------------|---------------|
| PVA-1/PAA-1 | 6.66      | 0.5        | 9.5          | 9.5             | 0.5                                     | 0.05       | 25            |
| PVA-2/PAA-2 | 6.66      | 1.0        | 9.5          | 9.5             | 0.1                                     | 0.05       | 25            |
| PVA-3/PAA-3 | 6.66      | 1.5        | 9.5          | 9.5             | 0.15                                    | 0.05       | 25            |
| PVA-4/PAA-4 | 6.66      | 2.0        | 9.5          | 9.5             | 0.2                                     | 0.05       | 25            |

$${}^b \text{Fe}^{3+} (\text{mol}\%) = [\text{mol} (\text{Fe}^{3+}) / \text{mol} (\text{AA})] \times 100\%$$

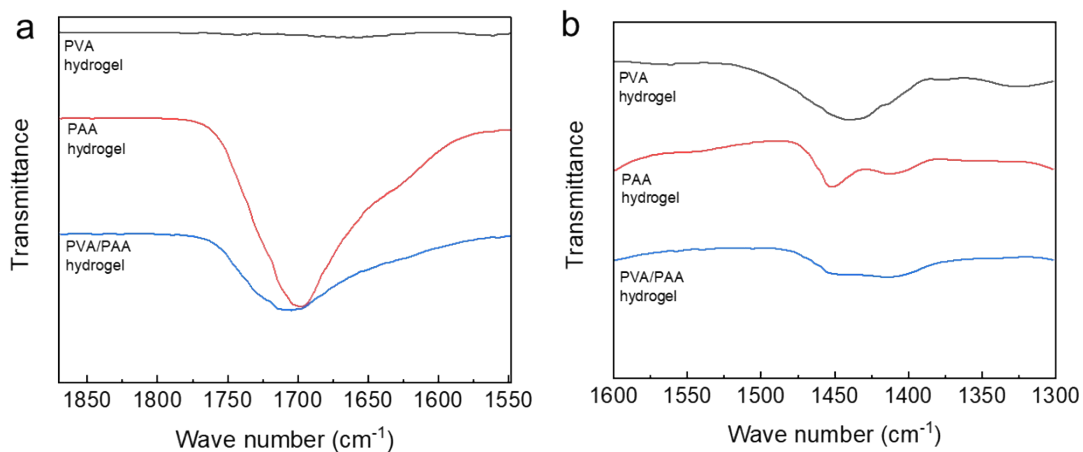

**Fig. S2** Partial amplification of FTIR spectra of hydrogel

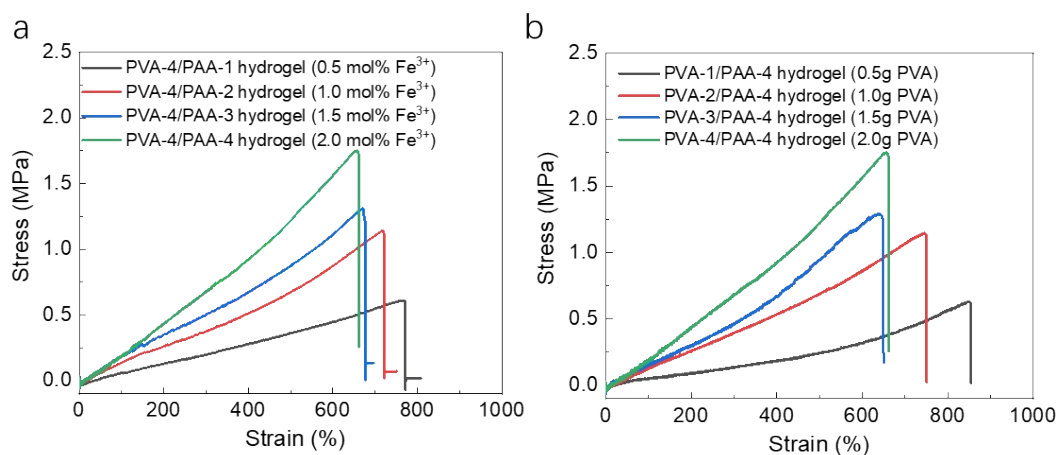

**Fig. S3** (a) Effect of  $\text{Fe}^{3+}$  concentration on mechanical properties of PVA/PAA hydrogel. (b) Effect of PVA content on mechanical properties of PVA/PAA hydrogel

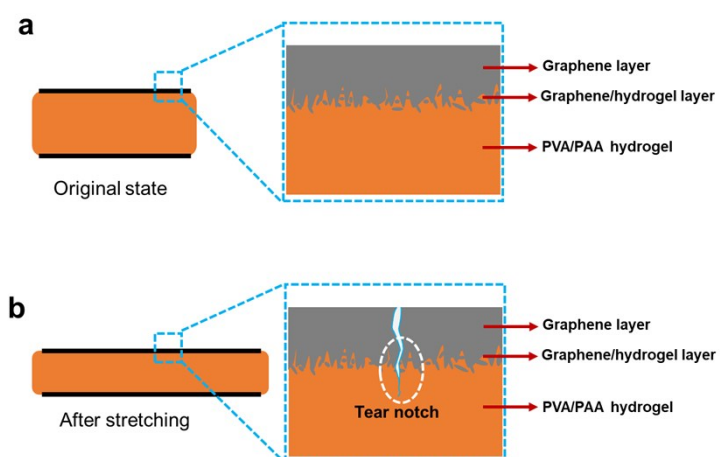

**Fig. S4** Changes of surface structure of G-hydrogel-G sandwich sensor during stretching

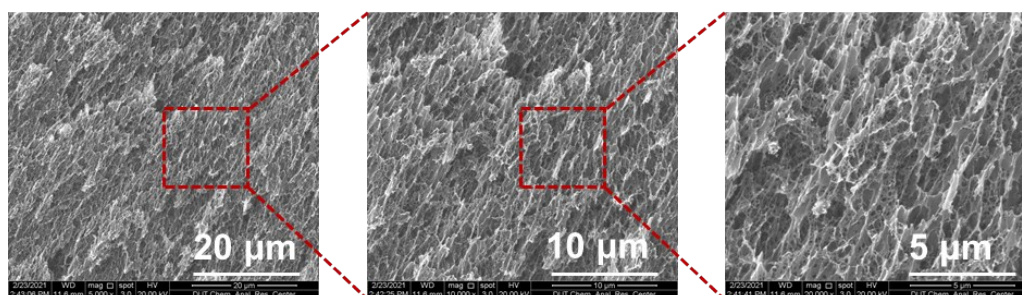

**Fig. S5** SEM images of PVA-4/PAA-4 hydrogel

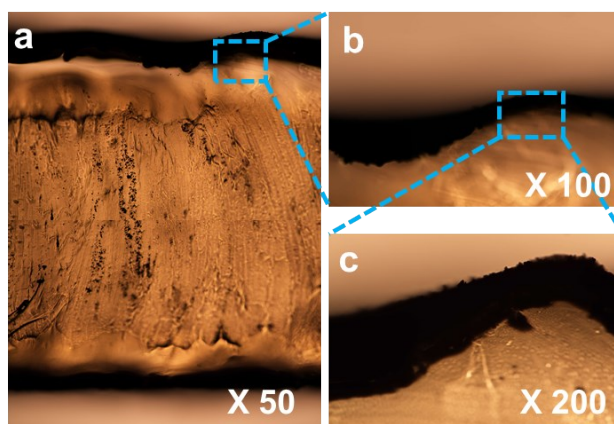

**Fig. S6** Optical micrographs<sup>a</sup> of sandwich strain sensor

a: Due to the large magnification of the microscope, the complete cross-sectional structure cannot be observed directly. Therefore, the upper and lower layers of the sensor cross section are independently observed with an optical microscope, then the two photos are combined into a complete cross-sectional optical micrograph.

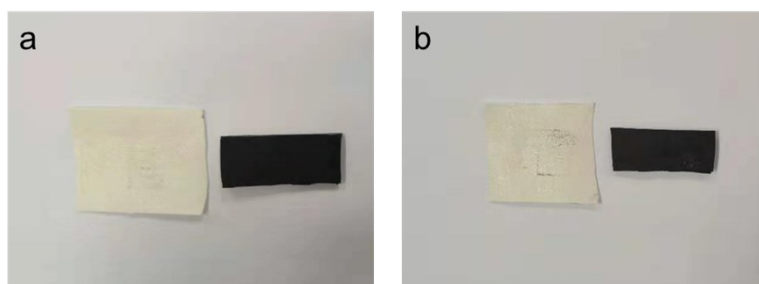

**Fig. S7** Adhesion stability of graphene layer. (a) original G-hydrogel-G sandwich sensor, (b) G-hydrogel-G sandwich sensor stored at room temperature for 10 days

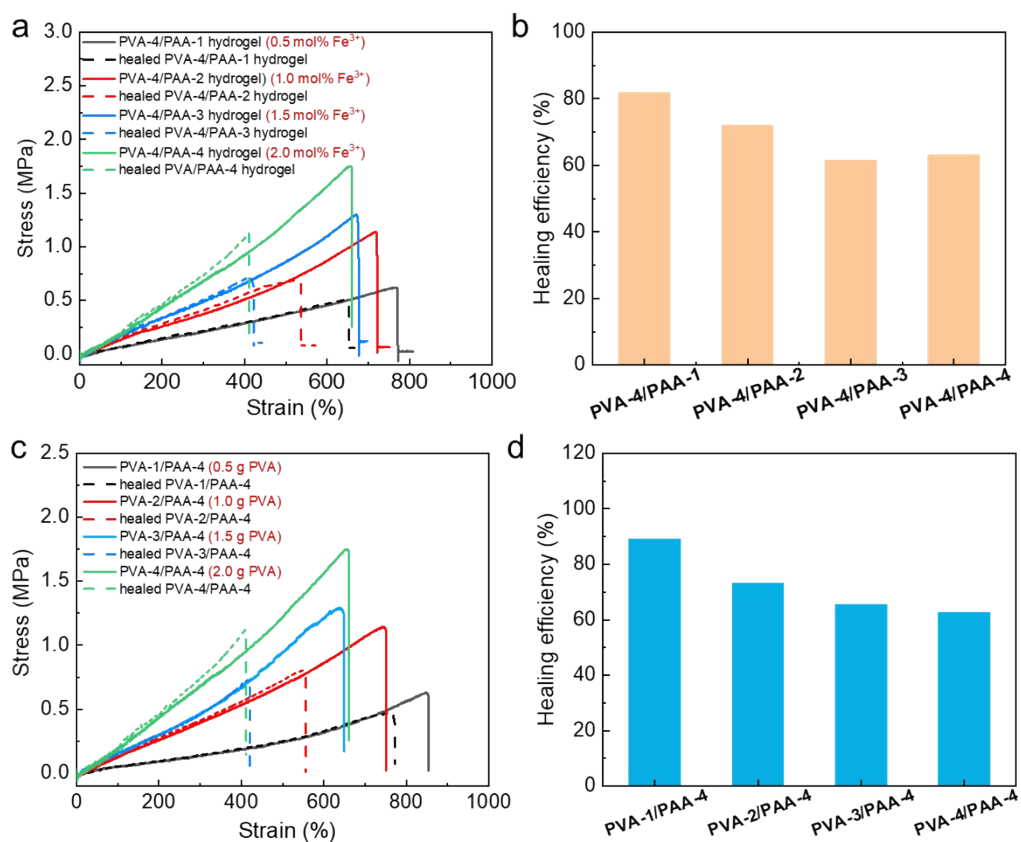

**Fig. S8** (a and b) Effect of Fe<sup>3+</sup> concentration on self-healing properties of PVA/PAA hydrogel. (c and d) Effect of PVA content on self-healing properties of PVA/PAA hydrogel

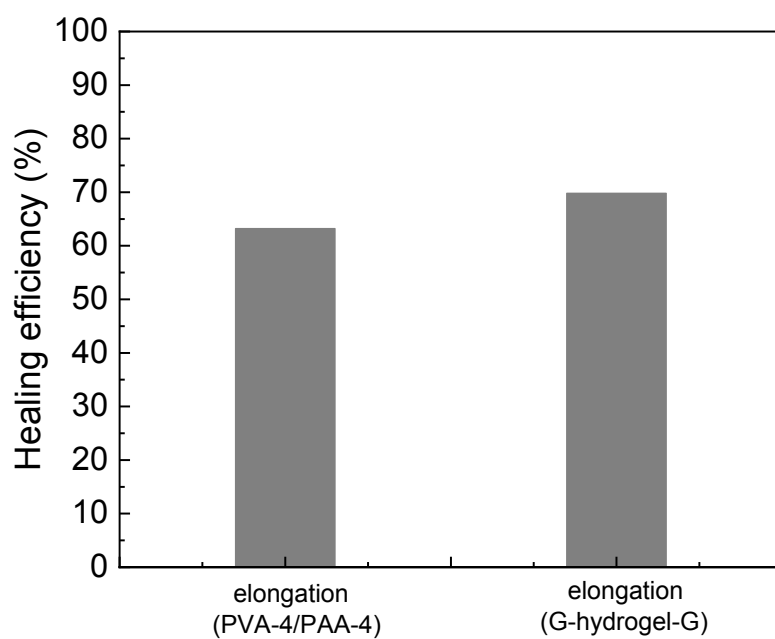

**Fig. S9** The self-healing efficiency of PVA-4/PAA-4 hydrogel and G-hydrogel-G sandwich strain sensor

**Table S3** Raw material compositions of PVA/PAA-W hydrogel

| Sample    | PVA<br>(g) | Glycerol<br>(g) | Water<br>(g) | AA<br>(g) | Fe <sup>3+</sup> <sup>b</sup><br>(mol%) | APS ( $\mu$ L)<br>(0.5 g/mL) |
|-----------|------------|-----------------|--------------|-----------|-----------------------------------------|------------------------------|
| PVA/PAA-W | 2.0        | 0               | 19           | 6.66      | 1                                       | 50                           |

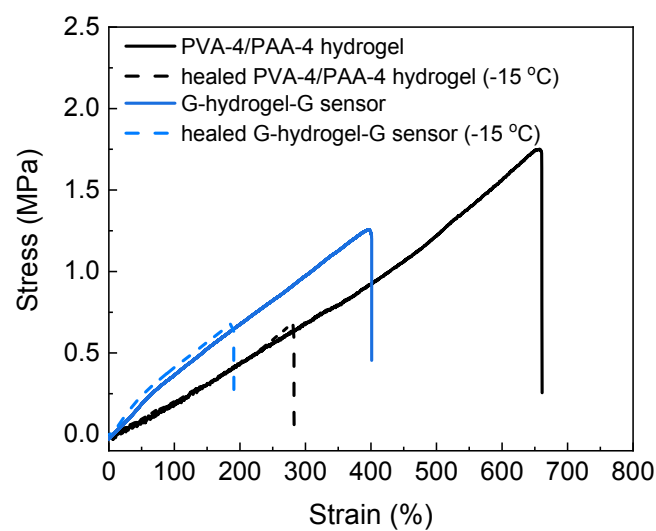

**Fig. S10** Self-healing efficiency of PVA-4/PAA-4 hydrogel and G-hydrogel-G sandwich strain sensor at -15 °C



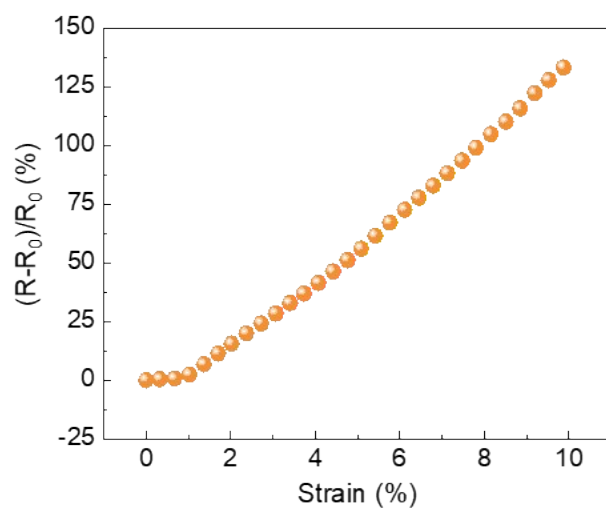

**Fig. S11** Relationships between resistance change and strain (<10% deformation)

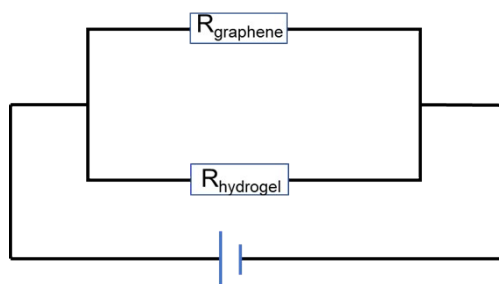

**Fig. S12** Working mechanism of the sandwich strain sensor

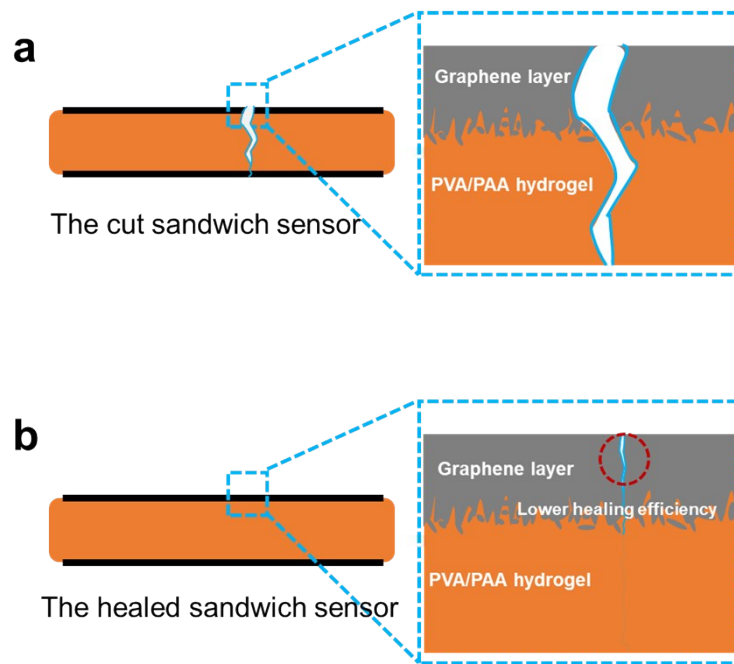

**Fig. S13** Healing process of sandwich sensor
